# Supplementary material
Source: PubMed Central journal article supplement (PMC4302044)
Supplement: NIHMS622535-supplement-Supplemental_Table.pdf [file NIHMS622535-supplement-Supplemental_Table.pdf]

| COUNTRY | CHR | SNP        | AVM | CON  | P_HWE_AVM | P_HWE_CON | FREQ_MISS_AVM | N_MISS_AVM | FREQ_MISS_CON | N_MISS_CON | MINOR_ALLELE | MAF_1000g_EUR | MAF_AVM | MAF_CON | OR_MAF             | P_MAF |
|---------|-----|------------|-----|------|-----------|-----------|---------------|------------|---------------|------------|--------------|---------------|---------|---------|--------------------|-------|
| Dutch   | 8   | rs10958409 | 164 | 1038 | 0,624     | 0,919     | 0,024         | 4          | 0             | 0          | A            | 0,149         | 0,152   | 0,140   | 1,08 (0,77 - 1,50) | 0,660 |
| Dutch   | 8   | rs9298506  | 163 | 1038 | 0,452     | 0,770     | 0,030         | 5          | 0             | 0          | G            | 0,173         | 0,163   | 0,193   | 0,81 (0,59 - 1,11) | 0,195 |
| Dutch   | 9   | rs1333040  | 160 | 1038 | 0,558     | 0,343     | 0,048         | 8          | 0             | 0          | C            | 0,425         | 0,469   | 0,450   | 1,07 (0,84 - 1,35) | 0,601 |
| Dutch   | 10  | rs12413409 | 164 | 1038 | 0,232     | 0,051     | 0,024         | 4          | 0             | 0          | A            | 0,088         | 0,085   | 0,078   | 1,11 (0,73 - 1,70) | 0,624 |
| Dutch   | 18  | rs11661542 | 164 | 1038 | 0,527     | 0,664     | 0,024         | 4          | 0             | 0          | C            | 0,483         | 0,488   | 0,499   | 0,96 (0,76 - 1,21) | 0,734 |
| USA     | 8   | rs10958409 | 338 | 510  | 0,240     | 0,605     | n/a           | n/a        | n/a           | n/a        | A            | 0,149         | 0,160   | 0,150   | 1,16 (0,88 - 1,53) | 0,301 |
| USA     | 8   | rs9298506  | 336 | 510  | 0,116     | 0,285     | 0,006         | 2          | 0             | 0          | G            | 0,173         | 0,143   | 0,181   | 0,74 (0,56 - 0,98) | 0,035 |
| USA     | 9   | rs1333040  | 338 | 510  | 0,365     | 0,928     | n/a           | n/a        | n/a           | n/a        | C            | 0,425         | 0,380   | 0,430   | 0,79 (0,64 - 0,98) | 0,029 |
| USA     | 10  | rs12413409 | 337 | 510  | 0,215     | 0,660     | 0,003         | 1          | 0             | 0          | A            | 0,088         | 0,096   | 0,113   | 0,84 (0,61 - 1,16) | 0,290 |
| USA     | 18  | rs11661542 | 326 | 510  | 0,002     | 1,000     | 0,037         | 12         | 0             | 0          | C            | 0,483         | 0,446   | 0,509   | 0,76 (0,62 - 0,94) | 0,010 |

*Italic = imputed*

CHR Chromosome

AVM AVM cases

CON Control subjects

P\_HWE p value for Hardy Weinberg Equilibrium

FREQ\_MISS Frequency missing

N\_MISS Number missing

MAF\_1000g\_CEU Minor allele frequency according to 1000genomes European populations

OR Odds Ratio

## SUPPLEMENTAL TABLE
